# Supplementary material
Source: HighWire-hosted journal article supplement (https://srh.bmj.com/highwire/filestream/142501/field_highwire_adjunct_files/0/bmjsrh-2022-201653supp001_data_supplement.pdf)

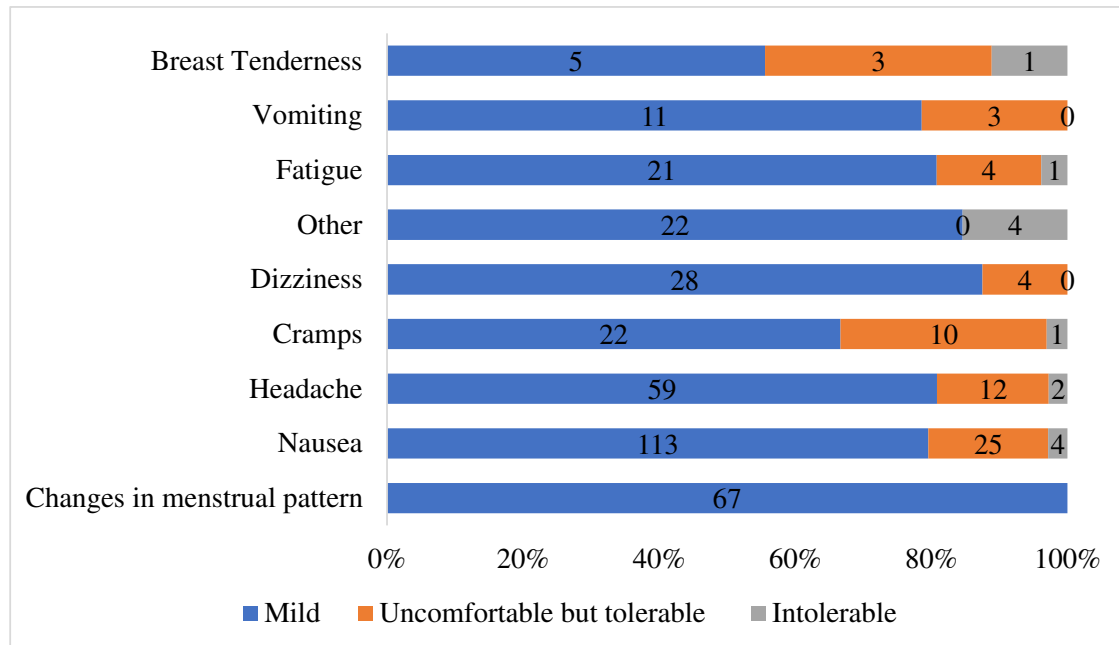

**Supplementary Figure 1: Self-reported side effects**

Supplement: bmjsrh-2022-201653supp001_data_supplement.pdf [file bmjsrh-2022-201653supp001_data_supplement.pdf]
